# Supplementary material
Source: Springer Nature journal article supplement (https://www.springermedizin.de/resource/supplementary/12957_2012_1201_MOESM2_ESM.pdf/9561998)

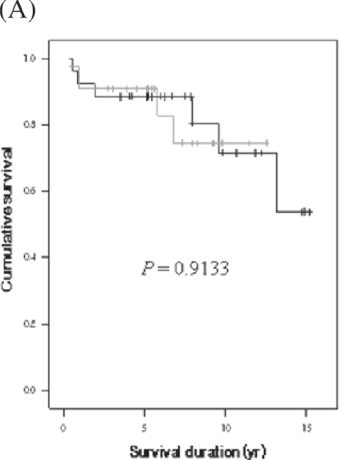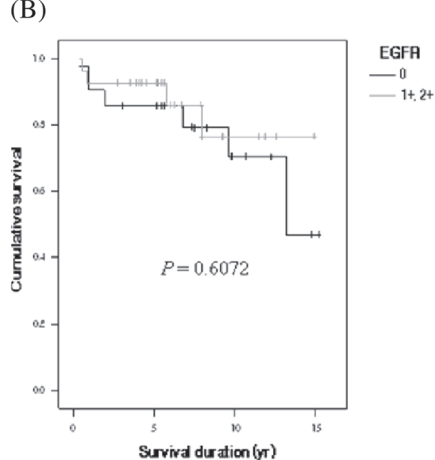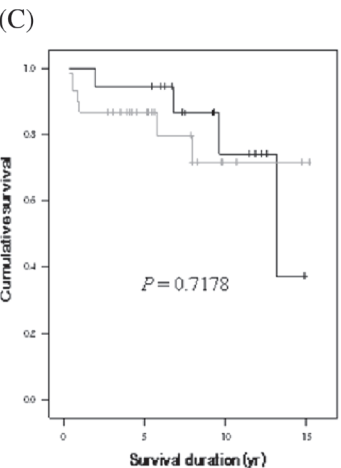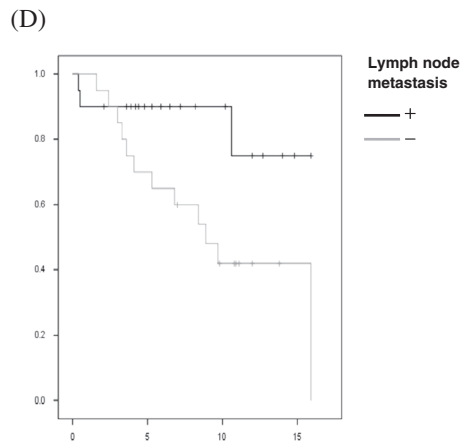

Supplement: MOESM2 [file 9561998]
